# Supplementary material for: Associations of PM2.5 and Black Carbon with Hospital Emergency Room Visits during Heavy Haze Events: A Case Study in Beijing, China
Source: Int J Environ Res Public Health. 2017 Jul 5;14(7):725. doi: 10.3390/ijerph14070725 (PMC5551163; doi:10.3390/ijerph14070725)
Supplement: Supplementary file 1 [file ijerph-14-00725-s001.pdf]

**Supplementary Materials: Associations of PM<sub>2.5</sub> and Black Carbon with Hospital Emergency Room Visits during Heavy Haze Events: A Case Study in Beijing, China**

**Table S1.** Sensitivity analysis on the imputation for missing data of BC in single-pollutant models.

| ERVs | Lag days | Percentage increase (95%CI) (%) |                                 |
|------|----------|---------------------------------|---------------------------------|
|      |          | With missing data of BC         | With missing-imputed data of BC |
| Res. | Lag02    | 27.6 (6.7, 52.6)                | 27.6 (9.6, 48.6)                |
| Car. | Lag0     | 11.6 (-10.5, 39.6)              | 18.8 (1.4, 39.2)                |
| Ocu. | Lag0     | 22.1 (3.6, 43.8)                | 11.8 (-1.4, 26.8)               |

**Table S2.** Sensitivity analysis on the adequacy of linear terms of PM<sub>2.5</sub> or BC in single-pollutant models.

| ERVs | Lag days | Percentage increase (95%CI) (%)  |                                       |                   |                        |
|------|----------|----------------------------------|---------------------------------------|-------------------|------------------------|
|      |          | Linear term of PM <sub>2.5</sub> | Non-linear terms of PM <sub>2.5</sub> | Linear term of BC | Non-linear terms of BC |
| Res. | Lag02    | 27.5 (13.0, 43.9)                | 26.3 (2.7, 55.3)                      | 27.6 (9.6, 48.6)  | 45.0 (17.4, 79.1)      |
| Car. | Lag0     | 19.4 (2.5, 39.0)                 | 16.7 (-5.8, 44.6)                     | 18.8 (1.4, 39.2)  | 18.8 (-3.4, 46.0)      |
| Ocu. | Lag0     | 12.6 (0.0, 26.7)                 | 5.6 (-10.2, 24.2)                     | 11.8 (-1.4, 26.8) | 7.2 (-8.7, 25.9)       |
